# Supplementary material for: Childhood Fish Consumption and Learning and Behavioral Disorders
Source: MDPI journal article supplement (doi:10.3390/ijerph13111069), 2016-11-02
Supplement: s1 [file s1]

# Supplementary Materials: Childhood Fish Consumption and Learning and Behavioral Disorders

Jenny L. Carwile, Lindsey J. Butler, Patricia A. Janulewicz, Michael R. Winter and Ann Aschengrau

**Table S1.** Varieties of fish typically consumed by participants in the Cape Cod Health Study reporting childhood (ages 7–12 years) fish consumption (N = 1057), according to mercury levels previously published by the FDA <sup>a</sup>.

| Variety of Fish          | N (%) <sup>b</sup> | Mercury, Mean (µg/g)                                              | 2004 FDA/EPA Consumption Advice <sup>b</sup> |
|--------------------------|--------------------|-------------------------------------------------------------------|----------------------------------------------|
| Low-mercury              |                    |                                                                   | Up to 2 meals/week                           |
| Fish sticks, frozen      | 59 (5.6)           | 0.003 <sup>c</sup>                                                |                                              |
| Salmon, fresh/frozen     | 13 (1.2)           | 0.02 <sup>d</sup>                                                 |                                              |
| Pollock                  | 1 (0.1)            | 0.04 <sup>d</sup>                                                 |                                              |
| Haddock                  | 62 (5.9)           | 0.07 <sup>d</sup>                                                 |                                              |
| Bass, striped            | 17 (1.6)           | 0.07 <sup>d</sup>                                                 |                                              |
| Flatfish                 | 45 (3.7)           | 0.08 <sup>d</sup>                                                 |                                              |
| Cod/ scrod               | 224 (21.2)         | 0.09 <sup>d</sup>                                                 |                                              |
| Mullet                   | 1 (0.1)            | 0.15 <sup>d</sup>                                                 |                                              |
| Halibut                  | 4 (0.4)            | 0.22 <sup>d</sup>                                                 |                                              |
| Canned tuna              |                    |                                                                   |                                              |
|                          | 569 (53.8)         | Chunk light: 0.12 <sup>d,e</sup><br>Albacore: 0.35 <sup>d,e</sup> | Up to 2 meals/week<br>Up to 1 meal/week      |
| High-mercury             |                    |                                                                   |                                              |
| Bass, freshwater         | 1 (0.1)            | 0.32 <sup>d</sup>                                                 |                                              |
| Bluefish                 | 30 (2.8)           | 0.35 <sup>d</sup>                                                 |                                              |
| Tuna, fresh, all species | 2 (0.2)            | 0.39 <sup>d</sup>                                                 |                                              |
| Swordfish                | 29 (2.7)           | 1.00 <sup>d</sup>                                                 | Avoid                                        |

<sup>a</sup> Mercury levels vary within species according to factors such as size and age of the fish and geographic location; <sup>b</sup> Percentages do not sum to 100 due to rounding; <sup>c</sup> Fish: what pregnant women and parents should know. Draft updated advice by the FDA and EPA/June 2014 [1]; <sup>d</sup> U.S. Food and Drug Administration. 2014 [2]; <sup>e</sup> Variety of canned tuna was not reported.

**Table S2.** Characteristics of 1179 participants, by typical variety of fish consumed during childhood (N (%)) <sup>a</sup>.

| Characteristic                 | Fish Typically Consumed during Childhood |                            |                       |                            |
|--------------------------------|------------------------------------------|----------------------------|-----------------------|----------------------------|
|                                | None (N = 122)                           | Low-Mercury Fish (N = 425) | Canned Tuna (N = 570) | High-Mercury Fish (N = 62) |
| Year of birth                  |                                          |                            |                       |                            |
| 1969–1974                      | 21 (17.2)                                | 116 (29.3)                 | 144 (25.3)            | 16 (25.8)                  |
| 1975–1980                      | 72 (59.0)                                | 213 (50.1)                 | 285 (50.0)            | 26 (41.9)                  |
| 1981–1983                      | 29 (23.8)                                | 96 (22.6)                  | 141 (24.7)            | 20 (32.3)                  |
| Current age (years), mean ± SD | 29.1 ± 3.5                               | 29.9 ± 3.9                 | 29.7 ± 3.9            | 29.2 ± 3.9                 |
| Male                           | 52 (42.6)                                | 179 (42.1)                 | 209 (36.7)            | 31 (50.0)                  |
| White race                     | 122 (100.0)                              | 418 (98.4)                 | 561 (98.4)            | 62 (100.0)                 |
| Birthweight (grams), mean ± SD | 3480 ± 537                               | 3470 ± 506                 | 3459 ± 496            | 3482 ± 458                 |
| Preterm (<37 weeks gestation)  | 8 (6.6)                                  | 16 (3.8)                   | 26 (4.6)              | 4 (6.5)                    |
| Participant was breastfed      | 70 (57.4)                                | 268 (64.7)                 | 355 (63.6)            | 42 (68.9)                  |
| Current level of education     |                                          |                            |                       |                            |
| High school graduate or less   | 17 (13.9)                                | 52 (12.2)                  | 68 (12.0)             | 7 (11.3)                   |
| Some college                   | 37 (30.3)                                | 105 (24.7)                 | 131 (23.0)            | 13 (21.0)                  |
| ≥4 years of college            | 68 (55.7)                                | 268 (63.1)                 | 370 (65.0)            | 42 (67.7)                  |

Table S2. Cont.

|                                                              | Fish Typically Consumed during Childhood |                               |                          |                               |
|--------------------------------------------------------------|------------------------------------------|-------------------------------|--------------------------|-------------------------------|
|                                                              | None<br>(N = 122)                        | Low-Mercury<br>Fish (N = 425) | Canned Tuna<br>(N = 570) | High-Mercury<br>Fish (N = 62) |
| Mother's age at participant's birth (years), mean $\pm$ SD   | 27.4 $\pm$ 4.3                           | 26.9 $\pm$ 4.5                | 27.1 $\pm$ 4.5           | 27.4 $\pm$ 4.4                |
| Father's age at participant's birth (years), mean $\pm$ SD   | 30.1 $\pm$ 6.2                           | 29.5 $\pm$ 5.7                | 29.3 $\pm$ 5.4           | 29.8 $\pm$ 5.4                |
| Mother's education level at participant's birth              |                                          |                               |                          |                               |
| High school graduate or less                                 | 49 (40.2)                                | 140 (32.9)                    | 199 (34.9)               | 15 (24.2)                     |
| Some college                                                 | 41 (33.6)                                | 140 (32.9)                    | 172 (30.2)               | 18 (29.0)                     |
| $\geq$ 4 years of college                                    | 32 (26.2)                                | 145 (34.1)                    | 199 (34.9)               | 29 (46.8)                     |
| Father's occupation at participant's birth                   |                                          |                               |                          |                               |
| White collar                                                 | 59 (49.2)                                | 212 (50.6)                    | 296 (52.5)               | 36 (58.1)                     |
| Blue collar                                                  | 39 (32.5)                                | 139 (33.2)                    | 167 (29.6)               | 16 (25.8)                     |
| Other                                                        | 22 (18.3)                                | 68 (16.2)                     | 101 (17.9)               | 10 (16.3)                     |
| Mother received prenatal care during participant's gestation | 121<br>(100.0)                           | 421 (99.5)                    | 563 (99.7)               | 61 (100.0)                    |
| Maternal smoking during pregnancy                            |                                          |                               |                          |                               |
| None                                                         | 83 (68.6)                                | 309 (73.2)                    | 422 (74.7)               | 43 (70.5)                     |
| Smoked $\leq$ 10 cigarettes a day                            | 12 (9.9)                                 | 50 (11.9)                     | 66 (11.7)                | 9 (14.8)                      |
| Smoked $\geq$ 11 cigarettes a day                            | 26 (21.5)                                | 63 (14.9)                     | 77 (13.6)                | 9 (14.8)                      |
| Maternal alcohol consumption during pregnancy                |                                          |                               |                          |                               |
| None                                                         | 66 (54.6)                                | 225 (53.3)                    | 316 (56.1)               | 33 (54.1)                     |
| 1–3 drinks/month                                             | 36 (29.8)                                | 134 (31.8)                    | 158 (28.1)               | 21 (34.4)                     |
| $\geq$ 1 drink/week                                          | 19 (15.7)                                | 63 (14.9)                     | 89 (15.8)                | 7 (11.5)                      |
| Family history of ADD/ADHD                                   | 25 (21.0)                                | 67 (16.2)                     | 76 (13.8)                | 10 (17.0)                     |
| Family history of learning disabilities                      | 22 (19.0)                                | 99 (24.2)                     | 96 (17.4)                | 10 (17.0)                     |

<sup>a</sup> Missing: highest education level of participant (N = 1), paternal occupation (N = 13), prenatal care (N = 8), maternal smoking (N = 10), family history of ADD/ADHD (N = 36), family history of learning disabilities (N = 42). Abbreviations: ADD, attention deficit disorder; ADHD, attention deficit hyperactivity disorder; SD, standard deviation.

**Table S3.** Variety of fish typically consumed during childhood (ages 7–12 years) and odds of learning and behavioral problems (N = 1179).

| OR and (95% CI)                      | Fish Typically Consumed during Childhood <sup>a</sup> |                               |                          |                               |
|--------------------------------------|-------------------------------------------------------|-------------------------------|--------------------------|-------------------------------|
|                                      | None<br>(N = 122)                                     | Low-Mercury<br>Fish (N = 425) | Canned Tuna<br>(N = 570) | High-Mercury<br>Fish (N = 62) |
| ADD/ADHD                             |                                                       |                               |                          |                               |
| Events/N                             | 3/117                                                 | 31/422                        | 37/566                   | 7/62                          |
| Model 1: Crude logistic              | 1.0 (Reference)                                       | 3.0 (0.9–10)                  | 2.7 (0.8–8.8)            | 4.8 (1.2–19)                  |
| Model 2: Unadjusted GEE              | 1.0 (Reference)                                       | 3.1 (0.9–11)                  | 2.7 (0.8–9.3)            | 5.0 (1.2–21)                  |
| Model 3: Adjusted GEE <sup>a</sup>   | 1.0 (Reference)                                       | 3.3 (1.0–11)                  | 3.1 (0.9–10)             | 4.4 (1.1–18)                  |
| Tutoring for reading                 |                                                       |                               |                          |                               |
| Events/N                             | 20/122                                                | 69/422                        | 82/565                   | 9/61                          |
| Model 1: Crude logistic              | 1.0 (Reference)                                       | 1.0 (0.6–1.7)                 | 0.9 (0.5–1.5)            | 0.9 (0.4–2.1)                 |
| Model 2: Unadjusted GEE              | 1.0 (Reference)                                       | 1.0 (0.6–1.7)                 | 0.9 (0.5–1.4)            | 0.9 (0.4–2.1)                 |
| Model 3: Adjusted GEE <sup>a</sup>   | 1.0 (Reference)                                       | 1.0 (0.6–1.8)                 | 0.9 (0.6–1.6)            | 1.0 (0.4–2.3)                 |
| Tutoring for math                    |                                                       |                               |                          |                               |
| Events/N                             | 18/114                                                | 63/410                        | 77/548                   | 6/62                          |
| Model 1: Crude logistic              | 1.0 (Reference)                                       | 1.0 (0.5–1.7)                 | 0.9 (0.5–1.5)            | 0.6 (0.2–1.5)                 |
| Model 2: Unadjusted GEE              | 1.0 (Reference)                                       | 1.0 (0.5–1.8)                 | 0.9 (0.5–1.6)            | 0.6 (0.2–1.6)                 |
| Model 3: Adjusted GEE <sup>a</sup>   | 1.0 (Reference)                                       | 1.0 (0.6–1.8)                 | 0.9 (0.5–1.7)            | 0.6 (0.2–1.7)                 |
| Special class placement <sup>b</sup> |                                                       |                               |                          |                               |
| Events/N                             | 20/122                                                | 53/420                        | 73/567                   | 7/62                          |
| Model 1: Crude logistic              | 1.0 (Reference)                                       | 0.7 (0.4–1.3)                 | 0.8 (0.4–1.3)            | 0.6 (0.3–1.6)                 |
| Model 2: Unadjusted GEE              | 1.0 (Reference)                                       | 0.7 (0.4–1.3)                 | 0.8 (0.4–1.3)            | 0.7 (0.3–1.7)                 |
| Model 3: Adjusted GEE <sup>a</sup>   | 1.0 (Reference)                                       | 0.8 (0.4–1.4)                 | 0.8 (0.5–1.4)            | 0.7 (0.3–1.9)                 |

Table S3. Cont.

|                                    | Fish Typically Consumed during Childhood <sup>a</sup> |                               |                          |                               |
|------------------------------------|-------------------------------------------------------|-------------------------------|--------------------------|-------------------------------|
|                                    | None<br>(N = 122)                                     | Low-Mercury<br>Fish (N = 425) | Canned Tuna<br>(N = 570) | High-Mercury<br>Fish (N = 62) |
| Individualized Education Plan      |                                                       |                               |                          |                               |
| Events/N                           | 9/121                                                 | 33/421                        | 38/564                   | 4/62                          |
| Model 1: Crude logistic            | 1.0 (Reference)                                       | 1.1 (0.5–2.3)                 | 0.9 (0.4–1.9)            | 0.9 (0.3–2.9)                 |
| Model 2: Unadjusted GEE            | 1.0 (Reference)                                       | 1.1 (0.5–2.4)                 | 0.9 (0.4–2.0)            | 0.9 (0.3–3.2)                 |
| Model 3: Adjusted GEE <sup>a</sup> | 1.0 (Reference)                                       | 1.1 (0.5–2.5)                 | 1.0 (0.5–2.1)            | 1.0 (0.3–3.3)                 |
| Attend summer school               |                                                       |                               |                          |                               |
| Events/N                           | 11/121                                                | 47/421                        | 58/568                   | 7/62                          |
| Model 1: Crude logistic            | 1.0 (Reference)                                       | 1.3 (0.6–2.5)                 | 1.1 (0.6–2.2)            | 1.3 (0.5–3.5)                 |
| Model 2: Unadjusted GEE            | 1.0 (Reference)                                       | 1.2 (0.6–2.4)                 | 1.1 (0.6–2.2)            | 1.2 (0.5–3.1)                 |
| Model 3: Adjusted GEE <sup>a</sup> | 1.0 (Reference)                                       | 1.3 (0.6–2.5)                 | 1.2 (0.6–2.4)            | 1.3 (0.5–3.4)                 |
| Repeat a grade                     |                                                       |                               |                          |                               |
| Events/N                           | 9/120                                                 | 56/421                        | 63/565                   | 4/62                          |
| Model 1: Crude logistic            | 1.0 (Reference)                                       | 1.9 (0.9–4.0)                 | 1.5 (0.7–3.2)            | 0.9 (0.3–2.9)                 |
| Model 2: Unadjusted GEE            | 1.0 (Reference)                                       | 1.9 (0.9–4.0)                 | 1.6 (0.7–3.2)            | 0.9 (0.2–2.9)                 |
| Model 3: Adjusted GEE <sup>a</sup> | 1.0 (Reference)                                       | 2.1 (1.0–4.3)                 | 1.7 (0.8–3.5)            | 0.9 (0.3–3.1)                 |
| High school degree or less         |                                                       |                               |                          |                               |
| Events/N                           | 17/122                                                | 52/425                        | 68/569                   | 7/62                          |
| Model 1: Crude logistic            | 1.0 (Reference)                                       | 0.9 (0.5–1.6)                 | 0.8 (0.5–1.5)            | 0.8 (0.3–2.0)                 |
| Model 2: Unadjusted GEE            | 1.0 (Reference)                                       | 0.8 (0.5–1.5)                 | 0.8 (0.5–1.4)            | 0.8 (0.3–2.1)                 |
| Model 3: Adjusted GEE <sup>a</sup> | 1.0 (Reference)                                       | 1.0 (0.5–1.8)                 | 1.0 (0.5–1.8)            | 1.2 (0.4–3.0)                 |

<sup>a</sup> Models adjusted for maternal age at birth ( $\leq 21$ , 22–25, 26–29,  $\geq 30$  years), maternal education at time of birth (high school diploma or less, some college, 4-year college grad or higher), and participant race (white, other), sex, year of birth (1969–1974, 1975–1980, 1981–1983), and combined gestational age/birthweight (preterm or  $< 2500$  g, term and  $\geq 2500$  g); <sup>b</sup> Assigned to a special class because of academic or behavioral problems; Abbreviations: ADD: attention deficit disorder; ADHD, attention deficit hyperactivity disorder; CI, confidence interval; GEE, generalized estimating equation; OR, odds ratio.

## References

1. U.S. Food and Drug Administration. Fish: What Pregnant Women and Parents Should Know. Draft Updated Advice by the FDA and EPA. Available online: <http://www.fda.gov/Food/Foodbornellness/Contaminants/Metals/ucm393070.htm> (accessed on 18 June 2014).
2. U.S. Food and Drug Administration. *A Quantitative Assessment of the Net Effects on Fetal Neurodevelopment from Eating Commercial Fish (As Measured by IQ and also Early Age Verbal Development in Children)*; Center for Food Safety and Applied Nutrition: Silver Spring, MD, USA, 2014.

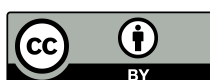

© 2016 by the authors; licensee MDPI, Basel, Switzerland. This article is an open access article distributed under the terms and conditions of the Creative Commons by Attribution (CC-BY) license (<http://creativecommons.org/licenses/by/4.0/>).
